# Supplementary material for: Helicobacter pylori type 4 secretion systems as gastroduodenal disease markers
Source: PubMed Central journal article supplement (PMC7907105; doi:10.1038/s41598-021-83862-1), 2021-02-25
Supplement: 41598_2021_83862_MOESM2_ESM.pdf [file 41598_2021_83862_MOESM2_ESM.pdf]

# ***Helicobacter pylori* type 4 secretion systems as gastroduodenal disease markers**

Bui Hoang Phuc, Vo Phuoc Tuan, Ho Dang Quy Dung, Tran Thanh Binh, Pham Huu Tung, Tran Dinh Tri, Ngo Phuong Minh Thuan,  
Vu Van Khiem, Tran Thi Huyen Trang, Junko Akada, Takeshi Matsumoto, and Yoshio Yamaoka

**Supplementary Material**

**Table S1: Assembly quality of 136 strains in this study**

| Strain name | Number of contigs <sup>a</sup> | Largest contigs | Total length <sup>b</sup> | N50     | N75    | L50 | L75 | GC%   | BUSCO | Accession                 |
|-------------|--------------------------------|-----------------|---------------------------|---------|--------|-----|-----|-------|-------|---------------------------|
| VN0211      | 28                             | 337,040         | 1,630,376                 | 154,782 | 59,734 | 4   | 9   | 38.67 | 88.5  | BNNC01000001-BNNC01000034 |
| VN0212      | 33                             | 237,579         | 1,616,411                 | 104,300 | 52,696 | 5   | 11  | 38.7  | 87.8  | BNND01000001-BNND01000037 |
| VN0219      | 32                             | 434,738         | 1,686,404                 | 218,516 | 57,859 | 3   | 7   | 38.57 | 87.2  | BNNE01000001-BNNE01000044 |
| VN0220      | 46                             | 236,982         | 1,605,297                 | 68,650  | 46,465 | 7   | 14  | 38.78 | 87.8  | BNNF01000001-BNNF01000054 |
| VN0223      | 30                             | 330,397         | 1,582,744                 | 167,078 | 74,463 | 3   | 7   | 38.85 | 87.8  | BNNG01000001-BNNG01000031 |
| VN0224      | 29                             | 362,285         | 1,578,831                 | 107,267 | 55,467 | 4   | 10  | 38.83 | 87.8  | BNNH01000001-BNNH01000030 |
| VN0227      | 39                             | 297,830         | 1,588,929                 | 106,597 | 53,568 | 5   | 11  | 38.73 | 88.5  | BNNI01000001-BNNI01000041 |
| VN0228      | 31                             | 301,343         | 1,575,300                 | 130,353 | 56,015 | 4   | 10  | 38.8  | 88.5  | BNNJ01000001-BNNJ01000034 |
| VN0229      | 42                             | 447,435         | 1,660,119                 | 87,401  | 53,729 | 4   | 10  | 38.6  | 87.2  | BNNK01000001-BNNK01000052 |
| VN0232      | 54                             | 334,509         | 1,624,318                 | 76,726  | 36,305 | 6   | 14  | 38.69 | 87.8  | BNNL01000001-BNNL01000062 |
| VN0235      | 25                             | 430,471         | 1,567,205                 | 144,419 | 70,040 | 3   | 7   | 38.85 | 87.2  | BNNM01000001-BNNM01000025 |
| VN0240      | 39                             | 316,923         | 1,583,113                 | 55,242  | 46,686 | 7   | 14  | 38.8  | 88.5  | BNNN01000001-BNNN01000049 |
| VN0244      | 37                             | 288,499         | 1,612,297                 | 75,303  | 52,933 | 5   | 12  | 38.12 | 87.2  | BNNO01000001-BNNO01000044 |
| VN0246      | 38                             | 234,831         | 1,594,478                 | 98,202  | 50,592 | 6   | 12  | 38.76 | 85.8  | BNNP01000001-BNNP01000043 |
| VN0264      | 38                             | 217,643         | 1,628,795                 | 79,438  | 51,971 | 6   | 13  | 38.68 | 87.8  | BNNQ01000001-BNNQ01000046 |
| VN0268      | 29                             | 336,628         | 1,609,558                 | 108,256 | 86,304 | 4   | 8   | 38.72 | 87.8  | BNNR01000001-BNNR01000033 |
| VN0271      | 34                             | 676,484         | 1,625,401                 | 184,705 | 53,219 | 2   | 7   | 38.72 | 87.8  | BNNS01000001-BNNS01000038 |
| VN0272      | 29                             | 267,305         | 1,573,025                 | 104,680 | 51,603 | 5   | 10  | 38.84 | 86.5  | BNNT01000001-BNNT01000030 |
| VN0274      | 46                             | 336,085         | 1,580,312                 | 72,729  | 46,828 | 4   | 11  | 38.81 | 87.2  | BNNU01000001-BNNU01000053 |
| VN0280      | 44                             | 170,803         | 1,589,529                 | 65,503  | 38,085 | 8   | 16  | 38.78 | 88.5  | BNNV01000001-BNNV01000046 |
| VN0283      | 46                             | 129,057         | 1,603,717                 | 53,616  | 39,968 | 10  | 18  | 38.79 | 88.5  | BNNW01000001-BNNW01000058 |
| VN0324      | 29                             | 429,620         | 1,577,639                 | 177,684 | 59,999 | 3   | 8   | 38.85 | 88.5  | BNNX01000001-BNNX01000030 |
| VN0338      | 43                             | 234,055         | 1,642,070                 | 109,182 | 51,935 | 6   | 12  | 38.64 | 87.8  | BNNY01000001-BNNY01000049 |
| VN0348      | 36                             | 246,525         | 1,644,511                 | 98,916  | 60,623 | 5   | 11  | 38.83 | 89.9  | BNNZ01000001-BNNZ01000037 |
| VN0352      | 23                             | 370,752         | 1,586,424                 | 211,641 | 68,205 | 3   | 7   | 38.83 | 87.2  | BNOA01000001-BNOA01000028 |
| VN0355      | 31                             | 655,895         | 1,606,763                 | 108,916 | 60,114 | 3   | 8   | 38.67 | 87.2  | BNOB01000001-BNOB01000033 |
| VN0361      | 45                             | 321,825         | 1,637,587                 | 82,853  | 53,790 | 5   | 11  | 38.66 | 87.8  | BNOC01000001-BNOC01000054 |
| VN0363      | 28                             | 541,182         | 1,579,593                 | 136,137 | 57,996 | 3   | 8   | 38.86 | 88.5  | BNOD01000001-BNOD01000032 |
| VN0366      | 35                             | 330,120         | 1,573,206                 | 107,419 | 65,919 | 4   | 8   | 38.8  | 87.8  | BNOE01000001-BNOE01000036 |
| VN0382      | 30                             | 230,640         | 1,566,005                 | 172,755 | 53,759 | 4   | 8   | 38.83 | 88.5  | BNOF01000001-BNOF01000030 |
| VN0390      | 29                             | 432,180         | 1,574,742                 | 124,862 | 53,167 | 3   | 10  | 38.8  | 87.8  | BNOG01000001-BNOG01000037 |
| VN0401      | 31                             | 238,985         | 1,641,573                 | 106,492 | 59,577 | 6   | 12  | 38.64 | 87.8  | BNOH01000001-BNOH01000032 |
| VN0403      | 33                             | 232,881         | 1,559,731                 | 66,989  | 54,639 | 7   | 13  | 38.87 | 88.5  | BNOI01000001-BNOI01000035 |
| VN0405      | 39                             | 235,478         | 1,613,669                 | 68,732  | 42,741 | 6   | 13  | 38.7  | 87.8  | BNOJ01000001-BNOJ01000050 |
| VN0406      | 27                             | 648,464         | 1,573,126                 | 178,717 | 58,002 | 2   | 7   | 38.77 | 87.8  | BNOK01000001-BNOK01000027 |
| VN0410      | 31                             | 131,312         | 1,599,970                 | 86,876  | 59,341 | 8   | 13  | 38.73 | 87.8  | BNOL01000001-BNOL01000033 |

|        |     |         |           |         |        |    |    |       |      |                           |
|--------|-----|---------|-----------|---------|--------|----|----|-------|------|---------------------------|
| VN0411 | 30  | 325,552 | 1,566,442 | 131,082 | 56,340 | 4  | 9  | 38.86 | 88.5 | BNOM01000001-BNOM01000032 |
| VN0418 | 30  | 235,227 | 1,668,999 | 172,176 | 77,198 | 4  | 8  | 38.6  | 87.8 | BNON01000001-BNON01000030 |
| VN0420 | 42  | 233,976 | 1,630,302 | 91,879  | 51,161 | 6  | 12 | 38.67 | 86.5 | BNOO01000001-BNOO01000047 |
| VN0431 | 32  | 423,191 | 1,566,026 | 108,091 | 55,116 | 4  | 9  | 38.84 | 88.5 | BNOP01000001-BNOP01000033 |
| VN0434 | 33  | 235,259 | 1,597,570 | 104,183 | 59,727 | 6  | 11 | 38.7  | 87.2 | BNOQ01000001-BNOQ01000035 |
| VN0438 | 25  | 362,194 | 1,571,559 | 199,187 | 58,533 | 3  | 8  | 38.83 | 87.8 | BNOR01000001-BNOR01000026 |
| VN0443 | 97  | 227,431 | 1,596,903 | 56,849  | 24,308 | 9  | 20 | 38.76 | 87.2 | BNOS01000001-BNOS01000127 |
| VN0448 | 41  | 334,954 | 1,600,753 | 107,589 | 42,908 | 5  | 13 | 38.71 | 87.2 | BNOT01000001-BNOT01000047 |
| VN0452 | 42  | 333,290 | 1,557,214 | 75,901  | 38,013 | 5  | 13 | 38.9  | 87.8 | BNOU01000001-BNOU01000059 |
| VN0453 | 61  | 237,246 | 1,595,496 | 65,116  | 42,898 | 8  | 16 | 38.78 | 85.8 | BNOV01000001-BNOV01000082 |
| VN0464 | 35  | 227,290 | 1,569,209 | 122,833 | 63,671 | 5  | 9  | 38.8  | 87.8 | BNOW01000001-BNOW01000041 |
| VN0472 | 39  | 400,244 | 1,599,160 | 67,410  | 52,635 | 5  | 12 | 38.75 | 87.8 | BNOX01000001-BNOX01000046 |
| VN0481 | 33  | 692,031 | 1,593,779 | 108,683 | 54,198 | 2  | 8  | 38.74 | 87.8 | BNOY01000001-BNOY01000036 |
| VN0484 | 129 | 100,573 | 1,606,762 | 45,923  | 20,959 | 12 | 25 | 38.84 | 87.9 | BNOZ01000001-BNOZ01000173 |
| VN0495 | 38  | 237,963 | 1,605,575 | 95,768  | 60,913 | 6  | 11 | 38.78 | 87.2 | BNPA01000001-BNPA01000046 |
| VN0511 | 40  | 393,223 | 1,643,921 | 207,635 | 67,493 | 3  | 7  | 38.66 | 88.5 | BNPB01000001-BNPB01000047 |
| VN0559 | 43  | 236,649 | 1,651,698 | 108,790 | 54,866 | 5  | 10 | 38.67 | 87.8 | BNPC01000001-BNPC01000046 |
| VN0754 | 31  | 318,655 | 1,605,059 | 95,059  | 65,816 | 5  | 10 | 38.74 | 87.2 | BNPK01000001-BNPK01000036 |
| VN0759 | 39  | 240,312 | 1,589,900 | 72,919  | 48,362 | 7  | 14 | 38.81 | 87.8 | BNPL01000001-BNPL01000044 |
| VN1154 | 29  | 313,196 | 1,573,179 | 107,557 | 65,489 | 4  | 9  | 38.77 | 89.2 | BNPQ01000001-BNPQ01000031 |
| VN1155 | 33  | 378,093 | 1,631,053 | 108,992 | 54,231 | 5  | 10 | 38.63 | 87.8 | BNPR01000001-BNPR01000036 |
| VN1156 | 30  | 231,954 | 1,574,628 | 70,526  | 58,237 | 5  | 11 | 38.84 | 87.8 | BNPS01000001-BNPS01000034 |
| VN1158 | 45  | 142,847 | 1,634,749 | 65,407  | 48,152 | 9  | 16 | 38.61 | 88.5 | BNPT01000001-BNPT01000050 |
| VN1161 | 36  | 242,737 | 1,585,941 | 74,033  | 53,617 | 6  | 12 | 38.73 | 87.2 | BNPU01000001-BNPU01000045 |
| VN1163 | 31  | 333,340 | 1,628,992 | 107,339 | 53,438 | 4  | 10 | 38.67 | 87.8 | BNPV01000001-BNPV01000032 |
| VN1165 | 33  | 459,318 | 1,595,474 | 111,244 | 54,119 | 3  | 10 | 38.68 | 87.8 | BNPW01000001-BNPW01000034 |
| VN1167 | 38  | 287,839 | 1,567,728 | 76,147  | 52,820 | 6  | 12 | 38.76 | 87.2 | BNPX01000001-BNPX01000043 |
| VN1169 | 41  | 234,189 | 1,607,416 | 72,653  | 48,808 | 6  | 13 | 38.67 | 88.5 | BNPY01000001-BNPY01000045 |
| VN1171 | 44  | 149,660 | 1,589,189 | 59,055  | 35,599 | 9  | 17 | 38.88 | 86.5 | BNPZ01000001-BNPZ01000046 |
| VN1172 | 53  | 173,717 | 1,645,458 | 77,084  | 38,972 | 8  | 16 | 38.91 | 87.2 | BNQA01000001-BNQA01000059 |
| VN1175 | 36  | 167,457 | 1,567,123 | 75,357  | 48,366 | 7  | 14 | 38.85 | 87.2 | BNQB01000001-BNQB01000037 |
| VN1176 | 56  | 111,892 | 1,568,799 | 59,099  | 36,227 | 10 | 18 | 38.89 | 88.5 | BNQC01000001-BNQC01000068 |
| VN1178 | 55  | 235,774 | 1,573,500 | 67,356  | 39,794 | 7  | 15 | 38.88 | 86.5 | BNQD01000001-BNQD01000059 |
| VN1180 | 38  | 467,285 | 1,621,371 | 74,667  | 52,428 | 5  | 12 | 38.73 | 86.5 | BNQE01000001-BNQE01000041 |
| VN1183 | 35  | 333,906 | 1,601,032 | 77,353  | 38,210 | 5  | 11 | 38.74 | 87.8 | BNQF01000001-BNQF01000043 |
| VN1184 | 42  | 226,656 | 1,683,321 | 109,600 | 60,695 | 5  | 11 | 38.69 | 89.2 | BNQG01000001-BNQG01000049 |
| VN1186 | 52  | 231,167 | 1,553,586 | 54,086  | 38,185 | 7  | 15 | 38.91 | 87.2 | BNQH01000001-BNQH01000068 |
| VN1192 | 37  | 246,754 | 1,625,927 | 76,918  | 46,809 | 6  | 13 | 38.75 | 87.8 | BNQI01000001-BNQI01000051 |

|        |    |         |           |         |        |    |    |       |      |                           |
|--------|----|---------|-----------|---------|--------|----|----|-------|------|---------------------------|
| VN1193 | 33 | 356,367 | 1,569,529 | 68,996  | 52,407 | 6  | 12 | 38.83 | 87.2 | BNQJ01000001-BNQJ01000038 |
| VN1195 | 46 | 152,432 | 1,570,491 | 56,539  | 33,752 | 9  | 17 | 38.84 | 88.5 | BNQK01000001-BNQK01000055 |
| VN1196 | 32 | 232,509 | 1,607,485 | 101,854 | 55,504 | 5  | 11 | 38.68 | 87.8 | BNQL01000001-BNQL01000037 |
| VN1197 | 25 | 407,899 | 1,576,234 | 163,670 | 54,775 | 3  | 7  | 38.84 | 87.2 | BNQM01000001-BNQM01000027 |
| VN1199 | 53 | 143,730 | 1,552,412 | 59,597  | 33,798 | 9  | 18 | 39.01 | 89.9 | BNQN01000001-BNQN01000062 |
| VN1200 | 42 | 209,434 | 1,643,572 | 86,665  | 52,865 | 6  | 12 | 38.9  | 87.2 | BNQO01000001-BNQO01000052 |
| VN1202 | 40 | 289,939 | 1,577,348 | 68,022  | 44,967 | 6  | 13 | 38.88 | 88.5 | BNQP01000001-BNQP01000046 |
| VN1203 | 33 | 261,369 | 1,560,976 | 122,661 | 57,430 | 4  | 10 | 38.88 | 89.2 | BNQQ01000001-BNQQ01000037 |
| VN1204 | 49 | 182,970 | 1,632,040 | 81,209  | 51,237 | 7  | 13 | 38.72 | 88.5 | BNQR01000001-BNQR01000055 |
| VN1205 | 33 | 321,209 | 1,562,120 | 84,335  | 52,122 | 6  | 12 | 38.9  | 87.8 | BNQS01000001-BNQS01000038 |
| VN1210 | 45 | 276,005 | 1,593,975 | 66,469  | 39,206 | 7  | 15 | 38.8  | 87.8 | BNQT01000001-BNQT01000053 |
| VN1212 | 27 | 398,794 | 1,604,961 | 171,487 | 60,010 | 3  | 8  | 38.66 | 88.5 | BNQU01000001-BNQU01000028 |
| VN1213 | 39 | 178,751 | 1,570,582 | 88,158  | 53,625 | 7  | 13 | 38.85 | 87.2 | BNQV01000001-BNQV01000043 |
| VN1215 | 56 | 144,923 | 1,607,869 | 48,963  | 26,712 | 12 | 22 | 38.75 | 87.2 | BNQW01000001-BNQW01000069 |
| VN1217 | 33 | 240,457 | 1,568,845 | 105,419 | 55,487 | 5  | 11 | 38.82 | 89.2 | BNQX01000001-BNQX01000040 |
| VN1218 | 28 | 280,854 | 1,560,660 | 149,567 | 69,590 | 4  | 8  | 38.92 | 88.5 | BNQY01000001-BNQY01000030 |
| VN1219 | 32 | 332,612 | 1,570,697 | 106,558 | 65,316 | 4  | 9  | 38.82 | 88.5 | BNQZ01000001-BNQZ01000034 |
| VN1221 | 33 | 323,707 | 1,600,328 | 109,285 | 55,421 | 4  | 10 | 38.73 | 87.2 | BNRA01000001-BNRA01000038 |
| VN1222 | 56 | 186,146 | 1,599,128 | 48,846  | 34,306 | 11 | 21 | 38.75 | 87.8 | BNRB01000001-BNRB01000061 |
| VN1224 | 26 | 276,011 | 1,616,667 | 191,015 | 57,526 | 4  | 8  | 38.68 | 88.5 | BNRC01000001-BNRC01000030 |
| VN1225 | 38 | 189,394 | 1,598,103 | 68,942  | 50,912 | 6  | 13 | 38.74 | 87.8 | BNRD01000001-BNRD01000046 |
| VN1226 | 35 | 234,276 | 1,553,258 | 104,260 | 55,437 | 6  | 11 | 38.89 | 88.5 | BNRE01000001-BNRE01000039 |
| VN1227 | 33 | 180,950 | 1,555,386 | 60,109  | 44,050 | 8  | 15 | 38.88 | 87.8 | BNRF01000001-BNRF01000037 |
| VN1229 | 40 | 303,291 | 1,646,110 | 98,179  | 52,866 | 6  | 12 | 38.9  | 87.8 | BNRG01000001-BNRG01000041 |
| VN1230 | 47 | 141,656 | 1,554,919 | 54,711  | 38,825 | 11 | 19 | 38.91 | 87.8 | BNRH01000001-BNRH01000052 |
| VN1233 | 57 | 230,695 | 1,569,932 | 43,902  | 32,171 | 11 | 22 | 38.78 | 85.8 | BNRI01000001-BNRI01000063 |
| VN1235 | 42 | 225,514 | 1,614,913 | 75,785  | 50,743 | 7  | 14 | 38.72 | 87.8 | BNRJ01000001-BNRJ01000048 |
| VN1236 | 36 | 246,849 | 1,579,799 | 73,711  | 52,588 | 6  | 12 | 38.82 | 87.2 | BNRK01000001-BNRK01000038 |
| VN1237 | 33 | 308,768 | 1,595,658 | 99,493  | 60,995 | 5  | 10 | 38.76 | 88.5 | BNRL01000001-BNRL01000042 |
| VN1239 | 37 | 240,237 | 1,595,872 | 73,587  | 52,944 | 6  | 12 | 38.74 | 87.8 | BNRM01000001-BNRM01000041 |
| VN1240 | 59 | 172,603 | 1,572,062 | 61,599  | 30,075 | 9  | 18 | 38.85 | 86.5 | BNRN01000001-BNRN01000087 |
| VN1241 | 39 | 235,168 | 1,620,787 | 82,821  | 44,758 | 6  | 13 | 38.67 | 87.2 | BNRO01000001-BNRO01000044 |
| VN1244 | 53 | 233,128 | 1,628,617 | 61,073  | 38,865 | 8  | 16 | 38.75 | 87.8 | BNRP01000001-BNRP01000061 |
| VN1246 | 53 | 185,606 | 1,592,059 | 52,248  | 32,198 | 10 | 19 | 38.76 | 88.5 | BNRQ01000001-BNRQ01000065 |
| VN1247 | 36 | 176,140 | 1,576,733 | 61,302  | 48,389 | 7  | 14 | 38.83 | 86.5 | BNRR01000001-BNRR01000041 |
| VN1248 | 52 | 220,604 | 1,559,161 | 59,431  | 34,472 | 7  | 16 | 38.85 | 88.5 | BNRS01000001-BNRS01000064 |
| VN1249 | 37 | 235,148 | 1,617,478 | 75,863  | 48,228 | 6  | 13 | 38.77 | 87.8 | BNRT01000001-BNRT01000039 |
| VN1250 | 28 | 428,071 | 1,573,970 | 107,165 | 57,261 | 4  | 10 | 38.85 | 89.2 | BNRU01000001-BNRU01000028 |

|        |    |         |           |         |        |    |    |       |      |                           |
|--------|----|---------|-----------|---------|--------|----|----|-------|------|---------------------------|
| VN1251 | 41 | 244,456 | 1,599,681 | 68,086  | 51,992 | 7  | 14 | 38.76 | 87.2 | BNRV01000001-BNRV01000049 |
| VN1258 | 23 | 675,092 | 1,587,516 | 174,398 | 53,829 | 2  | 7  | 38.78 | 87.8 | BNRW01000001-BNRW01000026 |
| VN1260 | 26 | 366,882 | 1,619,970 | 217,986 | 54,520 | 3  | 8  | 38.79 | 87.8 | BNRX01000001-BNRX01000027 |
| VN1261 | 29 | 436,746 | 1,647,578 | 107,386 | 55,364 | 4  | 9  | 38.62 | 87.8 | BNRY01000001-BNRY01000032 |
| VN1262 | 48 | 319,039 | 1,678,279 | 59,352  | 49,294 | 6  | 14 | 38.58 | 88.5 | BNRZ01000001-BNRZ01000057 |
| VN1263 | 30 | 433,970 | 1,618,364 | 170,034 | 69,125 | 3  | 7  | 38.68 | 88.5 | BNSA01000001-BNSA01000031 |
| VN1264 | 35 | 532,693 | 1,621,926 | 130,061 | 63,467 | 3  | 7  | 38.65 | 87.8 | BNSB01000001-BNSB01000039 |
| VN1266 | 26 | 371,650 | 1,607,715 | 206,830 | 64,795 | 3  | 7  | 38.71 | 88.5 | BNSC01000001-BNSC01000027 |
| VN1269 | 36 | 414,614 | 1,592,773 | 96,596  | 52,491 | 4  | 10 | 38.81 | 87.8 | BNSD01000001-BNSD01000038 |
| VN1270 | 34 | 235,450 | 1,606,632 | 133,890 | 51,325 | 5  | 10 | 38.76 | 87.2 | BNSE01000001-BNSE01000035 |
| VN1272 | 28 | 457,595 | 1,603,253 | 75,237  | 59,153 | 4  | 10 | 38.74 | 87.2 | BNSF01000001-BNSF01000033 |
| VN1274 | 33 | 235,483 | 1,587,600 | 104,717 | 59,526 | 5  | 10 | 38.77 | 88.5 | BNSG01000001-BNSG01000036 |
| VN1276 | 30 | 211,262 | 1,617,262 | 131,410 | 57,339 | 5  | 10 | 38.69 | 87.2 | BNSH01000001-BNSH01000034 |
| VN1277 | 43 | 246,971 | 1,570,223 | 76,213  | 37,505 | 7  | 15 | 38.85 | 87.2 | BNSI01000001-BNSI01000047 |
| VN1279 | 35 | 327,671 | 1,601,596 | 91,715  | 52,380 | 5  | 11 | 38.73 | 87.8 | BNSJ01000001-BNSJ01000038 |
| VN1280 | 27 | 434,171 | 1,583,722 | 156,037 | 55,363 | 3  | 9  | 38.86 | 87.2 | BNSK01000001-BNSK01000029 |
| VN1281 | 34 | 236,739 | 1,577,605 | 166,231 | 52,896 | 4  | 10 | 38.86 | 87.2 | BNSL01000001-BNSL01000038 |
| VN1283 | 64 | 138,799 | 1,611,849 | 47,867  | 30,988 | 11 | 21 | 38.68 | 87.2 | BNSM01000001-BNSM01000077 |
| VN1284 | 44 | 147,729 | 1,567,670 | 56,835  | 38,441 | 10 | 18 | 38.84 | 87.2 | BNSN01000001-BNSN01000057 |
| VN1286 | 62 | 117,495 | 1,629,874 | 61,406  | 35,038 | 10 | 19 | 38.66 | 87.8 | BNSO01000001-BNSO01000074 |
| VN1288 | 49 | 216,086 | 1,590,292 | 53,358  | 36,077 | 10 | 18 | 38.69 | 88.5 | BNSP01000001-BNSP01000052 |
| VN1289 | 49 | 204,476 | 1,598,138 | 50,184  | 28,401 | 8  | 18 | 38.8  | 87.8 | BNSQ01000001-BNSQ01000052 |
| VN1290 | 54 | 233,200 | 1,606,787 | 53,732  | 31,829 | 7  | 16 | 38.71 | 87.2 | BNSR01000001-BNSR01000063 |
| VN1291 | 81 | 201,587 | 1,672,214 | 47,413  | 26,793 | 10 | 23 | 38.57 | 87.8 | BNSS01000001-BNSS01000093 |

a: The number of contigs ( $\geq 500$  bp)

b: Total length of contigs ( $\geq 500$  bp)

**Table S2: Annotation of *tfs* ICE genes in *H. pylori* genome**

| <b>Annotation</b> | <b><i>tfs3</i> (India7)</b> | <b><i>tfs3</i> (Gambia94/24)</b> |                           | <b><i>tfs4a</i> (P12)</b> | <b><i>tfs4b</i> (Shi470)</b> | <b><i>tfs4c</i> (R036d)</b> |      |
|-------------------|-----------------------------|----------------------------------|---------------------------|---------------------------|------------------------------|-----------------------------|------|
| <i>xerT</i>       | 3725                        | 7345                             | <b><i>tfs4</i> module</b> | <b>L</b>                  | 437                          | 4480                        | 1010 |
| <i>virB6</i>      | 3760                        | 7375                             |                           |                           | 439                          | 4485                        | 1008 |
| <i>virD2</i>      | 3720                        | 7340                             |                           | 451                       | 4530                         | 996                         |      |
| <i>virD4</i>      | 3825                        | 7455                             |                           | 454                       | 4545                         | 993                         |      |
| <i>virB11</i>     | 3835                        | 7465                             |                           | <b>C</b>                  | 458                          | 4565                        | 990  |
| <i>virB10</i>     | 3855                        | 7485                             |                           |                           | 462                          | 4590                        | 986  |
| <i>virB9</i>      | 3860                        | 7490                             |                           | 463                       | 4595                         | 985                         |      |
| <i>virB8</i>      | 3865                        | 7495                             |                           | 464                       | 4600                         | 984                         |      |
| <i>virB7</i>      | 3870                        | 7500                             |                           | 465                       | 4605                         | 982                         |      |
| <i>virB4</i>      | 3875                        | 7505                             |                           | <b>R</b>                  | 467                          | 4615                        | 980  |
| <i>virB3</i>      | 3885                        | 7515                             |                           |                           | 468                          | 4620                        | 979  |
| <i>virB2</i>      | 3890                        | 7520                             |                           |                           | 469                          | 4625                        | 978  |

**Table S3: Pairwise sequence comparison of T4SS nucleotide sequences**Percentage sequence identity of nucleotide sequence from pairwise sequence comparison of *vir* homologous genes

| T4SS proteins | <i>A. tumefaciens</i> pTi plasmid <sup>1</sup> |                    |                       |                      | comB <sup>2</sup>         |                    |                       |                      | cagPAI <sup>2</sup>       |                    |                       |                      |
|---------------|------------------------------------------------|--------------------|-----------------------|----------------------|---------------------------|--------------------|-----------------------|----------------------|---------------------------|--------------------|-----------------------|----------------------|
|               | vs                                             |                    |                       |                      | vs                        |                    |                       |                      | vs                        |                    |                       |                      |
|               | <i>tfs3</i> (Gambia94/24)                      | <i>tfs4a</i> (P12) | <i>tfs4b</i> (Shi470) | <i>tfs4c</i> (R036d) | <i>tfs3</i> (Gambia94/24) | <i>tfs4a</i> (P12) | <i>tfs4b</i> (Shi470) | <i>tfs4c</i> (R036d) | <i>tfs3</i> (Gambia94/24) | <i>tfs4a</i> (P12) | <i>tfs4b</i> (Shi470) | <i>tfs4c</i> (R036d) |
| <b>VirB2</b>  | 38.5                                           | 41.9               | 42.2                  | 35.6                 | 61.0                      | 47.6               | 47.4                  | 46.9                 | 45.3                      | 41.8               | 45.5                  | 39.9                 |
| <b>VirB3</b>  | 40.6                                           | 42.1               | 42.5                  | 21.4                 | 57.6                      | 52.0               | 59.6                  | 47.4                 | -                         | -                  | -                     | -                    |
| <b>VirB4</b>  | 43.6                                           | 45.5               | 43                    | 44.8                 | 56.5                      | 52.3               | 53.2                  | 49.8                 | 46.2                      | 45.8               | 45.7                  | 45.5                 |
| <b>VirB6</b>  | 40.1                                           | 38.3               | 39.4                  | 38.7                 | -                         | 44.4               | -                     | 44.3                 | 44.4                      | 42.6               | 44.3                  | 47.2                 |
| <b>VirB7</b>  | 44.2                                           | 33.7               | 42.7                  | -                    | 50.7                      | 54.6               | 53.5                  | -                    | <15                       | <15                | <15                   | -                    |
| <b>VirB8</b>  | 37.7                                           | 35.5               | 41.6                  | 42.2                 | 42.3                      | 37.9               | 43.1                  | 49.2                 | 44.4                      | 38.4               | 44.1                  | 48.1                 |
| <b>VirB9</b>  | 29.6                                           | 34.4               | 34.9                  | 34.9                 | 39.3                      | 40.5               | 40.2                  | 40.6                 | 43.2                      | 46.1               | 46.9                  | 46.8                 |
| <b>VirB10</b> | 42.5                                           | 42.3               | 43.2                  | 42.1                 | 59.9                      | 54.2               | 53.9                  | 53.1                 | 38.4                      | 43.2               | 41.6                  | 37.9                 |
| <b>VirB11</b> | 43.6                                           | 45.4               | 45.2                  | 43.5                 | -                         | -                  | -                     | -                    | 50.9                      | 46.9               | 45                    | 48.5                 |
| <b>VirD2</b>  | -                                              | -                  | -                     | -                    | -                         | -                  | -                     | -                    | -                         | -                  | -                     | -                    |
| <b>VirD4</b>  | -                                              | -                  | -                     | -                    | -                         | -                  | -                     | -                    | 42.6                      | 40.2               | 38.5                  | 46.4                 |

1: T4SS genes of *Agrobacterium tumefaciens* pTi plasmid strain C582: indicated cagPAI, comB and *tfs3/4a/4b/4c* were retrieved from the same strain background

**Table S4: Pairwise sequence comparison of T4SS nucleotide sequences of *tfs3*, *tfs4a*, *tfs4b*, *tfs4c* ICE**

| <i>tfs</i> ICE genes | <i>tfs3</i> (Gambia94/24) |                       |                          | <i>tfs4b</i> (Shi470)   | <i>tfs4a</i> (P12) |                      |             |
|----------------------|---------------------------|-----------------------|--------------------------|-------------------------|--------------------|----------------------|-------------|
|                      | <i>tfs3</i><br>(India7)   | <i>tfs4a</i><br>(P12) | <i>tfs4b</i><br>(Shi470) | <i>tfs4c</i><br>(R036d) | <i>tfs4a</i> (P12) | <i>tfs4c</i> (R036d) |             |
| <i>xerT</i>          | <b>91.2</b>               | 68                    | 61.2                     | 67.6                    | 62.1               | 62.1                 | <b>98.2</b> |
| <i>virB2</i>         | <b>91.6</b>               | 51.2                  | 48.8                     | 50.8                    | 55.3               | 49.5                 | <b>83.5</b> |
| <i>virB3</i>         | <b>89</b>                 | 56.1                  | 56.7                     | 56.3                    | 59.8               | 56.4                 | <b>96.3</b> |
| <i>virB4</i>         | <b>91</b>                 | 53.5                  | 54.7                     | 53.7                    | 56.5               | 55.2                 | <b>96.5</b> |
| <i>virB6</i>         | 66.4                      | 46.2                  | 47.7                     | 47.1                    | 51.9               | 52.1                 | <b>93.7</b> |
| <i>virB7</i>         | 70.9                      | 48.3                  | 52.4                     | n.a                     | 56.5               | n.a                  | n.a         |
| <i>virB8</i>         | <b>86.8</b>               | 52.6                  | 52.9                     | 52.1                    | 59                 | 58.5                 | <b>96.3</b> |
| <i>virB9</i>         | <b>83.3</b>               | 45.4                  | 46.3                     | 45.8                    | <b>95.8</b>        | <b>96.3</b>          | <b>96.5</b> |
| <i>virB10</i>        | <b>91</b>                 | 57.2                  | 59.1                     | 57.5                    | <b>82.5</b>        | <b>82.3</b>          | <b>98</b>   |
| <i>virB11</i>        | <b>93.9</b>               | 58.3                  | 58.3                     | 56.2                    | <b>98.4</b>        | 61.6                 | 62          |
| <i>virD2</i>         | <b>87.9</b>               | 49.4                  | 48.8                     | 49.8                    | <b>95.5</b>        | 54.4                 | 55.1        |
| <i>virD4</i>         | <b>82.6</b>               | 46.1                  | 45.7                     | 54.1                    | <b>98.8</b>        | 48.7                 | 48.5        |



Table S5: Diversity of T4SS sequences of *tfs3*, *tfs4a/b/c*, *cagPAI*, and *comB* of *H. pylori* strains isolated from Vietnam

| <i>tfs</i> ICE type (total number of Vietnam strains possessed) | T4SS genes       | No. of strains possessing the corresponding <i>vir</i> gene with 80%< identity | Range of nucleotide identity to reference T4SS (%) | Reference strain       |                    |
|-----------------------------------------------------------------|------------------|--------------------------------------------------------------------------------|----------------------------------------------------|------------------------|--------------------|
| <b><i>tfs3</i> (n=62)</b>                                       | <i>xerT</i>      | 59                                                                             | 91–99                                              | Gambia94/24 and India7 |                    |
|                                                                 | <i>virB2</i>     | 37                                                                             | 91–98                                              |                        |                    |
|                                                                 | <i>virB3</i>     | 37                                                                             | 88–93                                              |                        |                    |
|                                                                 | <i>virB4</i>     | 37                                                                             | 89–97                                              |                        |                    |
|                                                                 | <i>virB6</i>     | 46                                                                             | 85–99                                              |                        |                    |
|                                                                 | <i>virB7</i>     | 32                                                                             | 96–98                                              |                        |                    |
|                                                                 | <i>virB8</i>     | 32                                                                             | 82–98                                              |                        |                    |
|                                                                 | <i>virB9</i>     | 35                                                                             | 86–97                                              |                        |                    |
|                                                                 | <i>virB10</i>    | 35                                                                             | 88–94                                              |                        |                    |
|                                                                 | <i>virB11</i>    | 35                                                                             | 91–95                                              |                        |                    |
|                                                                 | <i>virD4</i>     | 35                                                                             | 81–86                                              |                        |                    |
| <i>virD2</i>                                                    | 45               | 86–97                                                                          |                                                    |                        |                    |
| <b><i>tfs4</i> (n=105)</b>                                      | <b>L1 (n=41)</b> | <i>xerT</i>                                                                    | 41                                                 | 96-98                  | Shi470, P12, R036d |
|                                                                 |                  | <i>virB6</i>                                                                   | 41                                                 | 96-98                  |                    |
|                                                                 | <b>L2 (n=64)</b> | <i>xerT</i>                                                                    | 64                                                 | 95-98                  |                    |
|                                                                 |                  | <i>virB6</i>                                                                   | 28                                                 | 94-97                  |                    |
|                                                                 | <b>C1 (n=40)</b> | <i>virD2</i>                                                                   | 40                                                 | 92-100                 |                    |
|                                                                 |                  | <i>virD4</i>                                                                   | 30                                                 | 97-98                  |                    |
|                                                                 |                  | <i>virB11</i>                                                                  | 25                                                 | 94-99                  |                    |
|                                                                 |                  | <i>virB10</i>                                                                  | 27                                                 | 80-98                  |                    |
|                                                                 |                  | <i>virB9</i>                                                                   | 27                                                 | 92-98                  |                    |
|                                                                 | <b>C2 (n=4)</b>  | <i>virD2</i>                                                                   | 4                                                  | 96-97                  |                    |
|                                                                 |                  | <i>virD4</i>                                                                   | 4                                                  | 97-99                  |                    |
|                                                                 |                  | <i>virB11</i>                                                                  | 4                                                  | 98                     |                    |
|                                                                 |                  | <i>virB10</i>                                                                  | 4                                                  | 96                     |                    |
|                                                                 |                  | <i>virB9</i>                                                                   | 4                                                  | 94-97                  |                    |
|                                                                 | <b>R1 (n=27)</b> | <i>virB8</i>                                                                   | 26                                                 | 97-100                 |                    |
|                                                                 |                  | <i>virB7</i>                                                                   | 27                                                 | 92-100                 |                    |
|                                                                 |                  | <i>virB4</i>                                                                   | 21                                                 | 96-99                  |                    |
|                                                                 |                  | <i>virB3</i>                                                                   | 21                                                 | 98-100                 |                    |
| <i>virB2</i>                                                    |                  | 21                                                                             | 97-99                                              |                        |                    |
| <b>R2 (n=38)</b>                                                | <i>virB8</i>     | 5                                                                              | 97-98                                              |                        |                    |
|                                                                 | <i>virB7</i>     | 0                                                                              |                                                    |                        |                    |
|                                                                 | <i>virB4</i>     | 38                                                                             | 97-98                                              |                        |                    |
|                                                                 | <i>virB3</i>     | 38                                                                             | 91-99                                              |                        |                    |
|                                                                 | <i>virB2</i>     | 38                                                                             | 94-99                                              |                        |                    |
| <b><i>cagPAI</i> (n=130)</b>                                    | <i>virB2</i>     | 129                                                                            | 93–98                                              | 26695                  |                    |
|                                                                 | <i>virB4</i>     | 128                                                                            | 98–99                                              |                        |                    |
|                                                                 | <i>virB5</i>     | 128                                                                            | 93–96                                              |                        |                    |
|                                                                 | <i>virB6</i>     | 129                                                                            | 97–99                                              |                        |                    |
|                                                                 | <i>virB7</i>     | 129                                                                            | 98–99                                              |                        |                    |
|                                                                 | <i>virB8</i>     | 128                                                                            | 98–99                                              |                        |                    |
|                                                                 | <i>virB9</i>     | 129                                                                            | 97–99                                              |                        |                    |
|                                                                 | <i>virB10</i>    | 129                                                                            | 98                                                 |                        |                    |
|                                                                 | <i>virB11</i>    | 130                                                                            | 99                                                 |                        |                    |
|                                                                 | <i>virD4</i>     | 130                                                                            | 98                                                 |                        |                    |
| <b><i>comB</i> (n=136)</b>                                      | <i>virB2</i>     | 136                                                                            | 97–100                                             | 26695                  |                    |
|                                                                 | <i>virB3</i>     | 136                                                                            | 95–97                                              |                        |                    |
|                                                                 | <i>virB4</i>     | 136                                                                            | 97                                                 |                        |                    |
|                                                                 | <i>virB7</i>     | 136                                                                            | 91–100                                             |                        |                    |
|                                                                 | <i>virB8</i>     | 136                                                                            | 98                                                 |                        |                    |
|                                                                 | <i>virB9</i>     | 136                                                                            | 92–97                                              |                        |                    |
|                                                                 | <i>virB10</i>    | 136                                                                            | 98                                                 |                        |                    |



**Table S7: Distribution of *tfs3/4* ICE on geographical populations in Vietnam**

|                         |    | hpEurope (%), n=6 | hspEAsia (%), n=130 |
|-------------------------|----|-------------------|---------------------|
| <i>tfs3</i>             |    | 6 (100)           | 56 (43)             |
| <i>tfs4</i> module      | L1 | 4 (66)            | 37 (28)             |
|                         | L2 | 1 (16)            | 63 (48)             |
|                         | C1 | 1 (16)            | 39 (30)             |
|                         | C2 | 1 (16)            | 3 (23)              |
|                         | R1 | 1 (16)            | 26 (20)             |
|                         | R2 | 1 (16)            | 37 (28)             |
| <i>tfs4</i>             |    | 5 (83)            | 100 (76)            |
| <i>tfs</i> ICE positive |    | 6 (100)           | 117 (90.0)          |
